# Supplementary material for: Synthetic virology approaches to improve the safety and efficacy of oncolytic virus therapies
Source: Nat Commun. 2023 May 26;14:3035. doi: 10.1038/s41467-023-38651-x (PMC10213590; doi:10.1038/s41467-023-38651-x)
Supplement: Supplementary file 4 — Source Data [file 41467_2023_38651_MOESM4_ESM.xlsx]

## Sheet: Fig 1c
	MOI 1			MOI 0.1			MOI 0.01
DMSO	121987	109712	131953	109868	88976	91438	35989	22658	25123
Rapamycin (10 nM)	1321978	1432565	1299112	901123	925437	971145	252876	301657	229079

## Sheet: Fig 1d
	U2OS			HELA			A549			HT29
DMSO	110966	101987	121285	151748	148982	132759	88898	91987	88091	137561	142879	161986
Rapamycin (10 nM)	1321879	1467987	1365092	1375860	1487213	1231867	954571	800196	928561	1465091	1635942	1549981

## Sheet: Fig 1e
Hours	Cop-TK-iLuc-Rapa			Cop-TK-iLuc+Rapa			Cop-TK
2	80	20	40	200	50	70	90	300	100
12	1000	300	900	80	300	400	70	200	400
24	5800	3000	12000	1000	500	9000	3000	13000	4000
36	90000	110000	20000	70000	30000	45000	50000	80000	40000
48	220000	300000	700000	300000	32000	420000	500000	250000	350000
72	3200000	1900000	400000	3900000	4700000	3300000	4200000	9000000	2500000

## Sheet: Fig 1g
	Rapamycin			Everolimus			Ridaforolimus			Temsirolimus
DMSO	89654	91123	83213	95675	91875	92123	82349	84987	85386	99001	95871	85382
0.1 nM	263608	218800	260174	305244	378582	333115	286437	282263	230301	251765	200818	222255
1 nM	744706	851342	794765	836114	845940	890763	824562	711988	896574	753435	738766	700365
10 nM	1211387	1256783	1290548	1195123	1199657	1245274	1292602	1220367	1245983	1310564	1321194	1109678
100 nM	1265437	1265874	1193978	1367983	1343098	1340836	1190987	1010982	1209537	903503	963154	955836

## Sheet: Fig 1h
	U2OS			HELA
DMSO	9000000	7000000	6000000	1900000	1400000	1500000
Rapamycin	15000000	6000000	4000000	300000	1600000	1700000
Everolimus	3000000	17000000	6000000	1500000	900000	1600000
Ridaforolimus	6000000	5000000	17000000	1700000	1400000	2100000
Temsirolimus	14000000	4000000	8000000	2000000	1300000	1700000

## Sheet: Fig 1j
	Day 1					Day 3
DMSO	830000	4180000	15200000	2150000		634000000	95000000	343000000	224000000
Rapa (i.p.)	300000000	225000000	219000000	132000000		11100000	12200000	3630000	6490000
Ever (oral)	20700000	82500000	74700000	164000000		44400000	1410000	3850000	11900000
Rida (i.m.)	56500000	157000000	110000000	50400000		19200000	4060000	5170000	1500000
Temsi (i.v.)	82300000	222000000	357000000	414000000		34400000	46100000	7490000	53000000

## Sheet: Fig 2d
	P11				F17				H5R				LEO				LEO160				AP				O2A2L				PEL				Late-A2L
No Dox	15320	14078	15088	15710	4624	1351	1076	920	238587	240548	227651	231016	492179	491908	455729	446510	640255	622413	650185	695196	98734	99769	105441	101206	6931	7580	7356	5436	8897	7695	7685	6857	81542	77156	79177	78264
+ Dox	1746632	1769425	1936745	1960410	33127	32501	32598	32584	266454	258082	276743	295043	604055	567612	610348	574944	825862	687497	708730	731476	146397	149844	143248	156362	43612	43382	44558	43335	1466460	1437614	1429745		107142	109320	112432	28582

## Sheet: Fig 2e
	A549			HELA			HT29			SKOV3
-D	10654	9876	9087	16582	14975	14761	14185	14334	15226	11178	10231	9876
+D	974185	1007647	1022498	834470	891768	959941	803502	798745	710444	490323	476996	440095

## Sheet: Fig 2f
Hours	Cop-TK-iLuc-Dox			Cop-TK-iLuc+Dox			Cop-TK
2	120	50	70	60	50	90	120	240	50
12	60	100	130	130	110	130	100	50	800
24	3800	3600	4200	9000	8000	2000	20000	35000	46000
36	40000	50000	40000	40000	90000	30000	70000	85000	65000
48	90000	210000	270000	500000	200000	400000	150000	220000	190000
72	1100000	2100000	3200000	1000000	300000	300000	2000000	400000	1000000

## Sheet: Fig 2g
VV-CTRL																				VV-CTRL+Dox																				VV-TetR-iGFPLuc
	150000		1300000		3800000		3000000		2700000		450000		2000000		5500000		2300000		3500000		7000000		240000		1700000		400000		1500000		4300000		4200000		6000000		9000000		1100000		4700000		1500000		4900000		1000000		8000000

[truncated: 46 more sheets: Fig 3c, Fig 3d, Fig 3e, Fig 3f, Fig 3h, Fig 3i, Fig 3j, Fig 4b, Fig 4e, Fig 4h, Fig 4j, Fig 4l, Fig 5c, Fig 5e, Fig 5f, Fig 5h, Fig 6c, Fig 6d, Fig 6e, Fig 6f …]
